# Supplementary material for: Prion Protein Complexed to N2a Cellular RNAs through Its N-terminal Domain Forms Aggregates and Is Toxic to Murine Neuroblastoma Cells
Source: PubMed Central journal article supplement — J Biol Chem. 2008 Jul 11;283(28):19616–25. doi: 10.1074/jbc.M802102200 (PMC2443653; doi:10.1074/jbc.m802102200), 2008-07-11
Supplement: M802102200_1.pdf [file M802102200_1.pdf]

## SUPPLEMENTAL DATA

**Table S1. Effect of RNA extracts on rPrP23-231 and rPrPA51-90**

| RNA                            | PrP23-231            |                      |        | PrPA51-90            |                      |        |
|--------------------------------|----------------------|----------------------|--------|----------------------|----------------------|--------|
|                                | LS/LS <sub>0</sub> * | FI/FI <sub>0</sub> * | Δ CM** | LS/LS <sub>0</sub> * | FI/FI <sub>0</sub> * | Δ CM** |
| <b>Total RNA</b>               |                      |                      |        |                      |                      |        |
| -                              | 1                    | 1                    | 0      | 1                    | 1                    | 0      |
| N2aRNA                         | 21.18                | 1.03                 | 227    | 0.83                 | 0.88                 | 6      |
| vRNA                           | 6.08                 | 0.81                 | 270    | 3.18                 | 0.75                 | 80     |
| c6RNA                          | 13.41                | 0.77                 | 320    | 2.59                 | 0.73                 | 84     |
| ScRNA                          | 22.48                | 1.09                 | 647    | 2.15                 | 0.83                 | 288    |
| EcRNA                          | 5.31                 | 0.35                 | 583    | 0.83                 | 0.82                 | 120    |
| <b>Synthetic RNA sequences</b> |                      |                      |        |                      |                      |        |
| opRNA                          | 9.84                 | 0.80                 | 269    | 1.59                 | 1.04                 | 116    |
| SAF93                          | 4.53                 | 0.35                 | 125    | 1.51                 | 0.74                 | 266    |

\*\*Normalized values obtained by dividing each recorded value (in the presence of RNA) by the initial value (LS<sub>0</sub>, initial light scattering, FI<sub>0</sub>, initial fluorescence intensity) for free protein in solution; \*\*\*Changes in center of spectral mass (CM) values from the tryptophan emission spectra (cm<sup>-1</sup>). The eukaryotic cell lineages used were: Neuroblastoma (N2a), N2aRNA; Vero, vRNA; C6/36, c6RNA; *Saccharomyces cerevisiae* (BSC783/4a), ScRNA. Prokaryotic cells: *Escherichia coli* (BL21DE3), EcRNA.

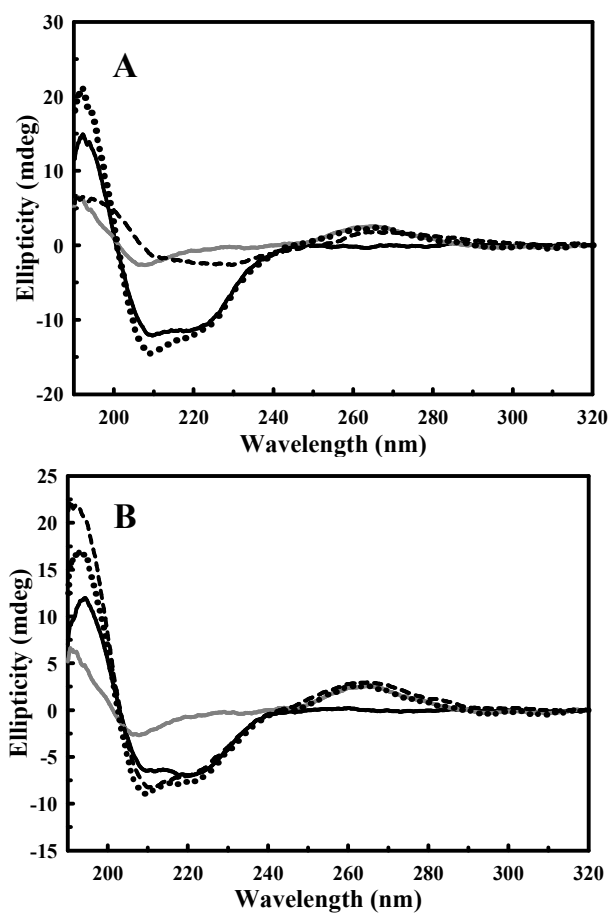

**Figure S1. Secondary structure effects of N2aRNA on rPrP23-231 and rPrP $\Delta$ 51-90. (A)** CD spectrum of rPrP23-231 at 0.69 mg/mL (solid black line); N2aRNA at 0.69 mg/mL (solid gray line); rPrP23-231 at 0.69 mg/mL + N2aRNA at 0.69 mg/mL (dashed line); free PrP23-231 at 0.96 mg/mL + free N2aRNA 0.69 mg/mL (dotted line). **(B)** CD spectra for rPrP $\Delta$ 51-90 at 0.57 mg/mL (solid black line); N2aRNA at 0.57 mg/mL (solid gray line); rPrP $\Delta$ 51-90 at 0.57 mg/mL + N2aRNA at 0.57 mg/mL (dashed line); and the sum of free rPrP $\Delta$ 51-90 at 0.57 mg/mL + spectrum of free N2aRNA at 0.57 mg/mL (dotted line).

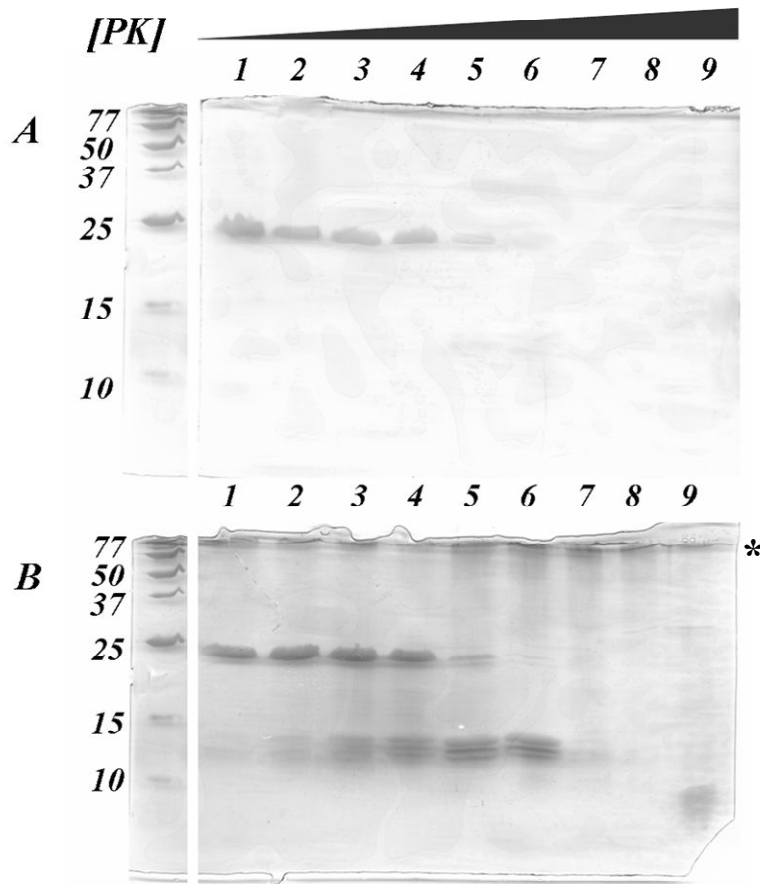

**Figure S2. rPrP23-231:N2aRNA aggregate is partially resistant to proteinase K digestion.** Silver-stained 15 % SDS-PAGE. Molecular markers are shown on the left for A and B. **(A)** rPrP23-231 at 0.69 mg/mL or **(B)** rPrP23-231:N2aRNA (0.69 mg/mL: 0.345mg/mL) treated with proteinase K for 1h at 37 °C. Relation rPrP23-231:PK (mg/mL): 1) non treated; 2) 10,000:1; 3) 5,000:1; 4) 1,000:1; 5) 500:1; 6) 100:1; 7) 50:1; 8) 10:1; 9) 5:1. The asterisk shows larger aggregates that are protease-resistant on the top of the gel.

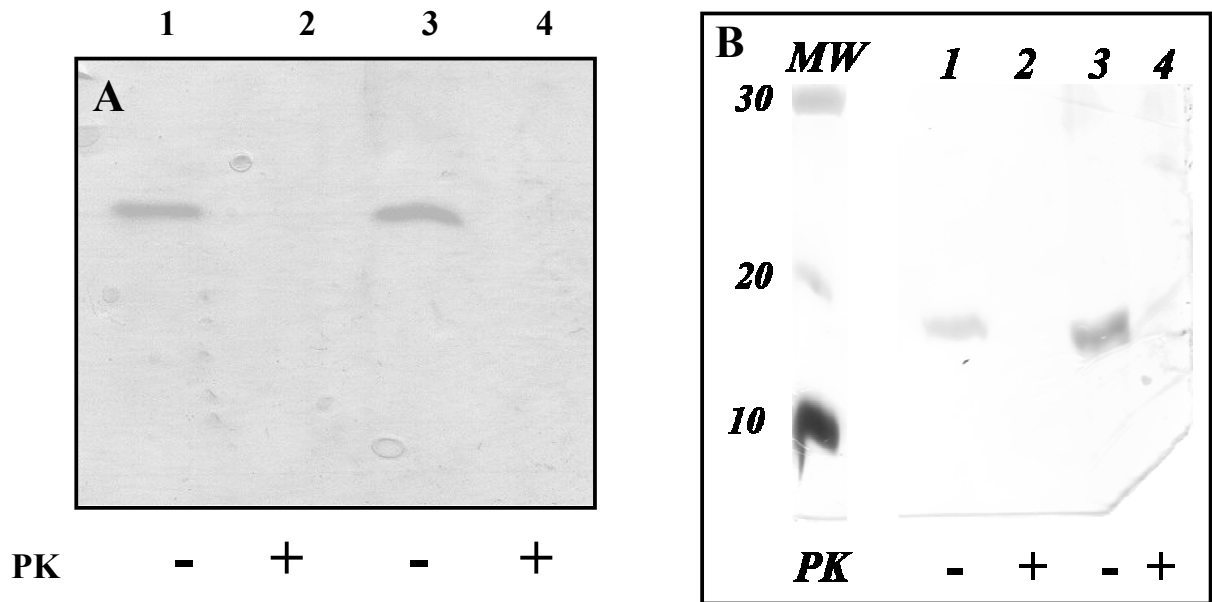

**Figure S3. rPrP $\Delta$ 51-90 does not acquire resistance to PK digestion in the presence of N2aRNA.** Samples were treated with proteinase K (PK) at 37 °C for 1 h (ratio PrP:PK = 100:1), except for where is indicated (-). (A) Western blotting for PrP C-terminal domain. Lanes 1 and 2, rPrP $\Delta$ 51-90 at 5 $\mu$ M; Lanes 3 and 4, rPrP $\Delta$ 51-90 at 5 $\mu$ M + N2aRNA at 0.0475 mg/mL. (B) Silver-stained 15 % SDS-PAGE. Lanes 1 and 2, rPrP $\Delta$ 51-90 at 30 $\mu$ M; Lanes 3 and 4, rPrP $\Delta$ 51-90 at 30 $\mu$ M + N2aRNA at 0.285 mg/mL. Molecular markers are shown in the left lane (MW).

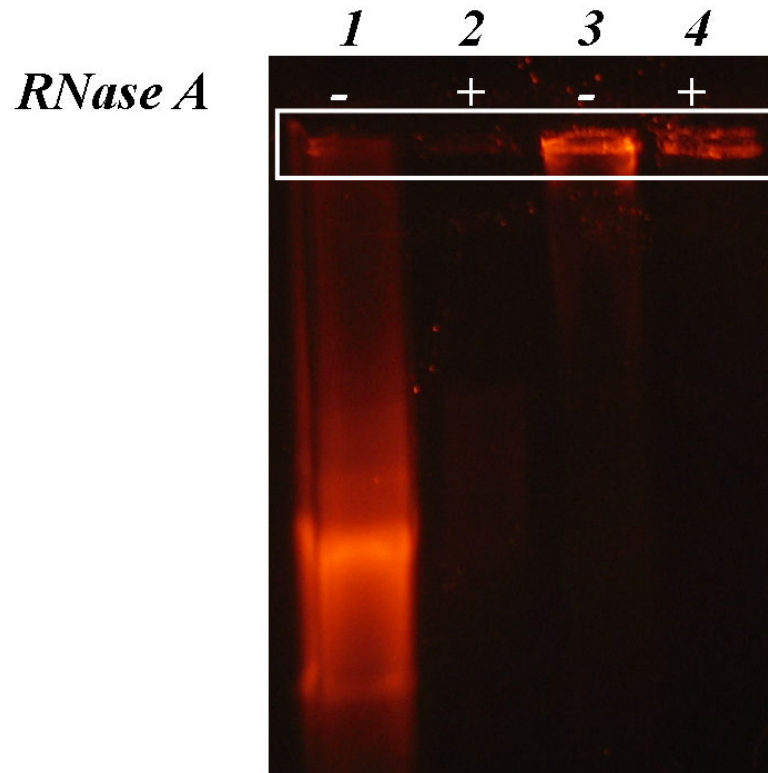

**Figure S4. N2aRNA complexed with rPrP23-231 is protected from RNase A digestion.** 0.8 % Agarose gel stained with ethidium bromide. Samples were treated with 0.004 mg/mL RNase A at room temperature for 1 h (ratio N2aRNA:RNase A = 100:1), except where indicated (-). Lanes 1 and 2, N2aRNA at 0.345 mg/mL; Lanes 3 and 4, rPrP23-231 at 0.69 mg/mL (30 $\mu$ M) + N2aRNA at 0.345 mg/mL.
